# Supplementary material for: A Formación Profesional: unha visión empresarial
Source: Springer Nature journal article supplement (doi:10.1186/s12874-019-0669-0), 1998-01-01
Supplement: MOESM1 [file 16441990]

## **STUDY NURSE QUESTIONNAIRE**

*Dear Madam, Dear Sir,*

*Thank you that you have already filled in the first questionnaire.*

*The study nurse will explain you the progress of this visit.*

# 1. WELCOME

Date of the appointment:   /   /      
 Day                      Month                      Year

Starting time:   :    
 Hours                      : Minutes

Initials of the study nurse:

## WELCOME CHECK LIST

| Yes                      | No                       |                                                                                                          |
|--------------------------|--------------------------|----------------------------------------------------------------------------------------------------------|
| <input type="checkbox"/> | <input type="checkbox"/> | The participants identity (name, birthday, gender) and address checked.                                  |
| <input type="checkbox"/> | <input type="checkbox"/> | Information letter and informed consent read and explained to the participant with advantages and risks. |
| <input type="checkbox"/> | <input type="checkbox"/> | Consent form signed in 2 copies.                                                                         |
| <input type="checkbox"/> | <input type="checkbox"/> | Home-based questionnaire validated with the participant.                                                 |

 **If no**, for what reason:

|                          |                                                                                         |
|--------------------------|-----------------------------------------------------------------------------------------|
| <input type="checkbox"/> | Forgotten by the participant.                                                           |
| <input type="checkbox"/> | Home-based questionnaire is not completed. It is given back with postage-paid envelope. |
| <input type="checkbox"/> | Refusal of filling in.                                                                  |

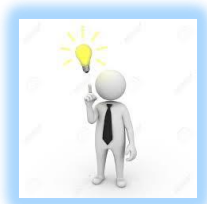

**IF POSSIBLE, GIVE THE PARTICIPANT NOTHING TO DRINK BETWEEN THE WELCOMING AND THE IMPEDANCEMETRY.**

## 2. COGNITION

### 2.1. CANTAB (Cambridge Neuropsychological Test Automated Battery)

*Five tests of the battery CANTAB are carried out:*

- 1. Motor Screening,*
- 2. Paired Associates Learning,*
- 3. Reaction Time,*
- 4. Spatial Working Memory,*
- 5. Rapid Visual Information Processing.*

2.1.1. ID of device:

2.1.2. The test has been carried out alone by the participant on a touchscreen:

- Yes  
 No

2.1.3. The participant has forgotten his glasses, the study nurse lend him reading glasses:

- Yes  
 No  
 Not applicable

2.1.4. Reason why the test was not carried out

- Refusal  
 Anxiety/Fear  
 Parkinson's disease, Tremor  
 Glasses forgotten, no glasses suitable  
 Test not understood  
 Other, specify : .....

2.1.5. Observations of the study nurse

.....  
.....  
.....  
.....

## 2.2. MMSE-2 (Mini-Mental State Examination)

*The study nurse conducts the examination with the participant in a quiet setting. She/he gives him sufficient time for responses. Do not hesitate to reinforce positively good answers and to minimise errors.*

*“I will ask you some questions in order to assess your memory skills. Some are very simple, others a little less. You have to respond as best as you can.”*

### 2.2.1. The test has been realised

Yes

No

### 2.2.2. Reason why the test was not carried out

Refusal

Other, specify: .....

*The study nurse staples the MMSE-2 test results on the next page.*

### 2.2.3. Assessment of level of consciousness

- Alert/responsive
- Drowsy
- Stuporous
- Comatose/unresponsive

*Now I would like to ask you some questions about your memory.*

#### REGISTRATION

2.2.4. Listen carefully. I am going to say three words. You say them back after I stop. Ready? Here they are... MILK [*pause*], SENSIBLE [*pause*], BEFORE [*pause*]. Now repeat those words back to me. [*Repeat up to 3 times, but score only the first trial.*]

| 3 words  | Response of the participant | Correct                  | Wrong                    |
|----------|-----------------------------|--------------------------|--------------------------|
| MILK     |                             | <input type="checkbox"/> | <input type="checkbox"/> |
| SENSIBLE |                             | <input type="checkbox"/> | <input type="checkbox"/> |
| BEFORE   |                             | <input type="checkbox"/> | <input type="checkbox"/> |

*Now keep those words in mind. I am going to ask you to say them again in a few minutes.*

#### ORIENTATION TO TIME

2.2.5. What day is today? What is ...

|                        | Response of the participant | Correct                  | Wrong                    |
|------------------------|-----------------------------|--------------------------|--------------------------|
| The year?              |                             | <input type="checkbox"/> | <input type="checkbox"/> |
| The season?            |                             | <input type="checkbox"/> | <input type="checkbox"/> |
| The month of the year? |                             | <input type="checkbox"/> | <input type="checkbox"/> |
| The day of the week?   |                             | <input type="checkbox"/> | <input type="checkbox"/> |
| The date?              |                             | <input type="checkbox"/> | <input type="checkbox"/> |

## ORIENTATION TO PLACE

2.2.6. What day is today? What is ...

*Alternative place words that are appropriate for the setting and increasingly precise may be substituted and noted.*

|                                                 | Response of the participant | Correct                  | Wrong                    |
|-------------------------------------------------|-----------------------------|--------------------------|--------------------------|
| State (or province)?                            |                             | <input type="checkbox"/> | <input type="checkbox"/> |
| County (or city/town)?                          |                             | <input type="checkbox"/> | <input type="checkbox"/> |
| City/town (or part of city/neighborhood)?       |                             | <input type="checkbox"/> | <input type="checkbox"/> |
| Building (name or type)?                        |                             | <input type="checkbox"/> | <input type="checkbox"/> |
| Floor of the building (room number or address)? |                             | <input type="checkbox"/> | <input type="checkbox"/> |

## RECALL

2.2.7. What were those three words I asked you to remember?

*The nurse does not offer any hints.*

| 3 words  | Response of the participant | Correct                  | Wrong                    |
|----------|-----------------------------|--------------------------|--------------------------|
| MILK     |                             | <input type="checkbox"/> | <input type="checkbox"/> |
| SENSIBLE |                             | <input type="checkbox"/> | <input type="checkbox"/> |
| BEFORE   |                             | <input type="checkbox"/> | <input type="checkbox"/> |

### 3. AUTONOMY

#### 3.1. ADL - Echelle de Katz: Independence in Activities of Daily Living

##### 3.1.1.

|           | <b>NO</b> supervision, direction or personal assistance                                                                                                       | <b>WITH</b> supervision, direction, personal assistance or total care                                                                            |
|-----------|---------------------------------------------------------------------------------------------------------------------------------------------------------------|--------------------------------------------------------------------------------------------------------------------------------------------------|
| Bathing   | <input type="checkbox"/> Bathes self completely or needs help in bathing only a single part of the body such as the back, genital area or disabled extremity. | <input type="checkbox"/> Needs help with bathing more than one part of the body, getting in or out of the tub or shower. Requires total bathing. |
| Dressing  | <input type="checkbox"/> Get clothes from closets and drawers and puts on clothes and outer garments complete with fasteners. May have help trying shoes.     | <input type="checkbox"/> Needs help with dressing self or needs to be completely dressed.                                                        |
| Toileting | <input type="checkbox"/> Goes to toilet, gets on and off, arranges clothes, cleans genital area without help.                                                 | <input type="checkbox"/> Needs help transferring to the toilet, cleaning self or uses bedpan or commode.                                         |

|              | <b>NO</b> supervision, direction or personal assistance                                                                   | <b>WITH</b> supervision, direction, personal assistance or total care                             |
|--------------|---------------------------------------------------------------------------------------------------------------------------|---------------------------------------------------------------------------------------------------|
| Transferring | <input type="checkbox"/> Moves in and out of bed or chair unassisted. Mechanical transferring aides are acceptable.       | <input type="checkbox"/> Needs help in moving from bed to chair or requires a complete transfer.  |
| Continence   | <input type="checkbox"/> Exercises complete self control over urination and defecation.                                   | <input type="checkbox"/> Is partially or totally incontinent of bowel or bladder.                 |
| Feeding      | <input type="checkbox"/> Gets food from plate into mouth without help. Preparation of food may be done by another person. | <input type="checkbox"/> Needs partial or total help with feeding or requires parenteral feeding. |



### 3.2. IADL - Echelle de LAWTON: Instrumental Activities of Daily Living Scale

#### 3.2.1. Ability to Use Telephone

|                          |                                                                   |
|--------------------------|-------------------------------------------------------------------|
| <input type="checkbox"/> | Operates telephone on own initiative; looks up and dials numbers. |
| <input type="checkbox"/> | Dials a few well-known numbers.                                   |
| <input type="checkbox"/> | Answers telephone, but does not dial.                             |
| <input type="checkbox"/> | Does not use telephone at all.                                    |

#### 3.2.2. Shopping

|                          |                                                 |
|--------------------------|-------------------------------------------------|
| <input type="checkbox"/> | Takes care of all shopping needs independently. |
| <input type="checkbox"/> | Shops independently for small purchases.        |
| <input type="checkbox"/> | Needs to be accompanied on any shopping trip.   |
| <input type="checkbox"/> | Completely unable to shop.                      |

#### 3.2.3. Food Preparation

|                          |                                                                                        |
|--------------------------|----------------------------------------------------------------------------------------|
| <input type="checkbox"/> | Plans, prepares and serves adequate meals independently.                               |
| <input type="checkbox"/> | Prepares adequate meals if supplied with ingredients.                                  |
| <input type="checkbox"/> | Heats and serves prepared meals or prepares meals but does not maintain adequate diet. |
| <input type="checkbox"/> | Needs to have meals prepared and served.                                               |

#### 3.2.4. Housekeeping

|                          |                                                                                  |
|--------------------------|----------------------------------------------------------------------------------|
| <input type="checkbox"/> | Maintains house alone with occasion assistance (heavy work).                     |
| <input type="checkbox"/> | Performs light daily tasks such as dishwashing, bed making.                      |
| <input type="checkbox"/> | Performs light daily tasks, but cannot maintain acceptable level of cleanliness. |
| <input type="checkbox"/> | Needs help with all home maintenance tasks.                                      |
| <input type="checkbox"/> | Does not participate in any housekeeping tasks.                                  |

### 3.2.5. Laundry

|                          |                                                     |
|--------------------------|-----------------------------------------------------|
| <input type="checkbox"/> | Does personal laundry completely.                   |
| <input type="checkbox"/> | Launders small items, rinses socks, stockings, etc. |
| <input type="checkbox"/> | All laundry must be done by others.                 |

### 3.2.6. Mode of Transportation

|                          |                                                                                 |
|--------------------------|---------------------------------------------------------------------------------|
| <input type="checkbox"/> | Travels independently on public transportation or drives own car.               |
| <input type="checkbox"/> | Arranges own travel via taxi, but does not otherwise use public transportation. |
| <input type="checkbox"/> | Travels on public transportation when assisted or accompanied by another.       |
| <input type="checkbox"/> | Travel limited to taxi or automobile with assistance of another.                |
| <input type="checkbox"/> | Does not travel at all.                                                         |

### 3.2.7. Responsibility for Own Medications

|                          |                                                                                |
|--------------------------|--------------------------------------------------------------------------------|
| <input type="checkbox"/> | Is responsible for taking medication in correct dosages at correct time.       |
| <input type="checkbox"/> | Takes responsibility if medication is prepared in advance in separate dosages. |
| <input type="checkbox"/> | Is not capable of dispensing own medication.                                   |

### 3.2.8. Ability to Handle Finances

|                          |                                                                                                                                          |
|--------------------------|------------------------------------------------------------------------------------------------------------------------------------------|
| <input type="checkbox"/> | Manages financial matters independently (budgets, writes checks, pays rent and bills, goes to bank); collects and keeps track of income. |
| <input type="checkbox"/> | Manages day-to-day purchases, but needs help with banking, major purchases, etc.                                                         |
| <input type="checkbox"/> | Incapable of handling money.                                                                                                             |



|                        | Yes                      | No                       | Disease diagnosed by a medical doctor? |                          | Disease in treatment?    |                          |
|------------------------|--------------------------|--------------------------|----------------------------------------|--------------------------|--------------------------|--------------------------|
|                        |                          |                          | Y                                      | N                        | Y                        | N                        |
| Kidney problems        | <input type="checkbox"/> | <input type="checkbox"/> | <input type="checkbox"/>               | <input type="checkbox"/> | <input type="checkbox"/> | <input type="checkbox"/> |
| Psoriasis              | <input type="checkbox"/> | <input type="checkbox"/> | <input type="checkbox"/>               | <input type="checkbox"/> | <input type="checkbox"/> | <input type="checkbox"/> |
| Psoriatic arthritis    | <input type="checkbox"/> | <input type="checkbox"/> | <input type="checkbox"/>               | <input type="checkbox"/> | <input type="checkbox"/> | <input type="checkbox"/> |
| Gout                   | <input type="checkbox"/> | <input type="checkbox"/> | <input type="checkbox"/>               | <input type="checkbox"/> | <input type="checkbox"/> | <input type="checkbox"/> |
| Rheumatoid arthritis   | <input type="checkbox"/> | <input type="checkbox"/> | <input type="checkbox"/>               | <input type="checkbox"/> | <input type="checkbox"/> | <input type="checkbox"/> |
| Ankylosing spondylitis | <input type="checkbox"/> | <input type="checkbox"/> | <input type="checkbox"/>               | <input type="checkbox"/> | <input type="checkbox"/> | <input type="checkbox"/> |
| Crohn's disease        | <input type="checkbox"/> | <input type="checkbox"/> | <input type="checkbox"/>               | <input type="checkbox"/> | <input type="checkbox"/> | <input type="checkbox"/> |
| Ulcerative colitis     | <input type="checkbox"/> | <input type="checkbox"/> | <input type="checkbox"/>               | <input type="checkbox"/> | <input type="checkbox"/> | <input type="checkbox"/> |

4.1.2. Have you experienced **in the course of the last year** one or several of the following events?

| Yes                      | No                       |                                            |
|--------------------------|--------------------------|--------------------------------------------|
| <input type="checkbox"/> | <input type="checkbox"/> | The death of a person close to you         |
| <input type="checkbox"/> | <input type="checkbox"/> | A personal, serious disease                |
| <input type="checkbox"/> | <input type="checkbox"/> | A serious disease of a person close to you |
| <input type="checkbox"/> | <input type="checkbox"/> | A personal admission at hospital           |
| <input type="checkbox"/> | <input type="checkbox"/> | A divorce                                  |
| <input type="checkbox"/> | <input type="checkbox"/> | A traffic accident                         |
| <input type="checkbox"/> | <input type="checkbox"/> | A crime                                    |

→ If the participant is a man, SKIP TO chapter **MEDICATION AND SUPPLEMENTS** on page 17

## 4.2. WOMEN'S HEALTH

### 4.2.1. Do you have a cycle?

- Yes  
 No

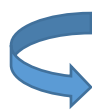

**If not**, have you had one of the following surgeries at any time in your life:

|                       | Yes                      | No                       |
|-----------------------|--------------------------|--------------------------|
| Hysterectomy          | <input type="checkbox"/> | <input type="checkbox"/> |
| Bilateral ovariectomy | <input type="checkbox"/> | <input type="checkbox"/> |

### 4.2.2. Do you have children?

- Yes  
 No

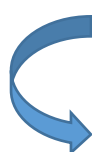

**If yes**, how many children do you have?

Child(ren)

### 4.2.3. Do you currently breastfeed or have you breastfed in the past?

- Yes  
 No

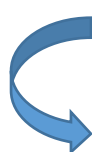

**If yes**, complete the following table:

|                       | Duration (months)                         | Not applicable           |
|-----------------------|-------------------------------------------|--------------------------|
| Current breastfeeding | <input type="text"/> <input type="text"/> | <input type="checkbox"/> |
| Child 1 breastfeeding | <input type="text"/> <input type="text"/> | <input type="checkbox"/> |
| Child 2 breastfeeding | <input type="text"/> <input type="text"/> | <input type="checkbox"/> |
| Child 3 breastfeeding | <input type="text"/> <input type="text"/> | <input type="checkbox"/> |
| Child 4 breastfeeding | <input type="text"/> <input type="text"/> | <input type="checkbox"/> |
| Child 5 breastfeeding | <input type="text"/> <input type="text"/> | <input type="checkbox"/> |
| Child 6 breastfeeding | <input type="text"/> <input type="text"/> | <input type="checkbox"/> |
| Child 7 breastfeeding | <input type="text"/> <input type="text"/> | <input type="checkbox"/> |

4.2.4. Are you currently going through menopause?

- Yes
- No
- I do not know

→ GO to chapter **MEDICATION AND SUPPLEMENTS** on page 17

**If yes**, what is the date of your last menstruations?

|     |  |   |       |  |   |      |  |  |  |
|-----|--|---|-------|--|---|------|--|--|--|
|     |  | / |       |  | / |      |  |  |  |
| Day |  |   | Month |  |   | Year |  |  |  |

4.2.5. Do you currently follow a treatment for the menopause?

- Yes
- No
- I do not know

→ GO to chapter **MEDICATION AND SUPPLEMENTS** on page 17

4.2.6. Which type of treatment is it?

|                                                | Yes                      | No                       |
|------------------------------------------------|--------------------------|--------------------------|
| Hormones                                       | <input type="checkbox"/> | <input type="checkbox"/> |
| Vaginal local treatment                        | <input type="checkbox"/> | <input type="checkbox"/> |
| Non hormonal treatment against hot flashes     | <input type="checkbox"/> | <input type="checkbox"/> |
| Homeopathy                                     | <input type="checkbox"/> | <input type="checkbox"/> |
| Plants                                         | <input type="checkbox"/> | <input type="checkbox"/> |
| → If yes, are they phytoestrogens (e.g. soya)? | <input type="checkbox"/> | <input type="checkbox"/> |
| Acupuncture                                    | <input type="checkbox"/> | <input type="checkbox"/> |
| Other treatment, specify :<br>.....            | <input type="checkbox"/> | <input type="checkbox"/> |
| I do not know                                  | <input type="checkbox"/> | <input type="checkbox"/> |

### 4.3. MEDICATION AND SUPPLEMENTS

4.3.1. Do you currently take medications and/or supplements?

Yes

No → **SKIP TO chapter VITAMINS SUPPLY on page 19**

4.3.2. Did you bring your medicine packages or a prescription and/or a list with the **supplements** with you?

Yes

No

4.3.3. Would you allow me to have a look and write down which medicines you are taking?

Yes

Refusal

Forgotten or missing data

*Ask the person if she regularly takes sleeping pills.*

| Name         | Galenic form | Dosage | Number of dosage units | Frequency | Duration                        |
|--------------|--------------|--------|------------------------|-----------|---------------------------------|
| i.e. ASPIRIN | TABLET       | 500 MG | 2                      | 1-0-1-0   | 5 DAYS/<br>3 MONTHS/<br>7 YEARS |
|              |              |        |                        |           |                                 |
|              |              |        |                        |           |                                 |
|              |              |        |                        |           |                                 |
|              |              |        |                        |           |                                 |
|              |              |        |                        |           |                                 |





#### 4.4. VITAMINS SUPPLY

4.4.1. Do you regularly take vitamins, minerals or other supplements?

Yes

No → **SKIP TO chapter NUTRITION on page 20**

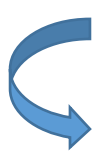

**If yes, do you take:**

| Yes                      | No                       |                                  |
|--------------------------|--------------------------|----------------------------------|
| <input type="checkbox"/> | <input type="checkbox"/> | Multivitamins (WITH minerals)    |
| <input type="checkbox"/> | <input type="checkbox"/> | Multivitamins (WITHOUT minerals) |
| <input type="checkbox"/> | <input type="checkbox"/> | Fish oil (including cod liver)   |
| <input type="checkbox"/> | <input type="checkbox"/> | Garlic                           |
| <input type="checkbox"/> | <input type="checkbox"/> | Iron                             |
| <input type="checkbox"/> | <input type="checkbox"/> | Zinc                             |
| <input type="checkbox"/> | <input type="checkbox"/> | Calcium                          |
| <input type="checkbox"/> | <input type="checkbox"/> | Vit A                            |
| <input type="checkbox"/> | <input type="checkbox"/> | Vit B (including B6 and B12)     |
| <input type="checkbox"/> | <input type="checkbox"/> | Vit C                            |
| <input type="checkbox"/> | <input type="checkbox"/> | Vit D                            |
| <input type="checkbox"/> | <input type="checkbox"/> | Vit E                            |

4.4.2. Do your vitamin tablets contain folic acid?

Yes

No

I do not know

## 5. NUTRITION

### 5.1. FFQ ONLINE (Food Frequency Questionnaire)

**The past 3 months,**

What type of food and drink have you regularly consumed and in what quantities?

Try to think about your eating habits during the week and on weekends, at home and in the restaurant.

A manual with photos will guide you through the filling in.

## 6. CONDITIONS OF REALISING EXAMINATIONS

### 6.1.1. Room temperature

,  °C

### 6.1.2. Has the participant done any of the following activities **1 hour before the examination?**

|                                 |                              |                             |
|---------------------------------|------------------------------|-----------------------------|
| Smoked                          | <input type="checkbox"/> Yes | <input type="checkbox"/> No |
| Drank something else than water | <input type="checkbox"/> Yes | <input type="checkbox"/> No |

### 6.1.3. Before starting the anthropometry, the study nurse checks the following conditions together with the participant:

|                                                              | Yes                      | No                       | Time      | Not applicable           |
|--------------------------------------------------------------|--------------------------|--------------------------|-----------|--------------------------|
| Alcohol consumption in the last 12 hours                     | <input type="checkbox"/> | <input type="checkbox"/> | ___ h ___ | <input type="checkbox"/> |
| Vigorous exercise less than 12 hours before the measurement  | <input type="checkbox"/> | <input type="checkbox"/> | ___ h ___ | <input type="checkbox"/> |
| Excessive intake of food and drink on the day of measurement | <input type="checkbox"/> | <input type="checkbox"/> | ___ h ___ | <input type="checkbox"/> |
| Ate and drank in the last 3 hours before measurement         | <input type="checkbox"/> | <input type="checkbox"/> | ___ h ___ | <input type="checkbox"/> |
| Urinated right before measurement (advice)                   | <input type="checkbox"/> | <input type="checkbox"/> | ___ h ___ | <input type="checkbox"/> |

## 7. ANTHROPOMETRY

### 7.1. BODY MEASUREMENTS

#### HEIGHT

7.1.1. ID number of device

7.1.2. Measurement of the height

,  cm

Not measured

7.1.3. Reason why the size has not been measured

Refusal

Other, specify: .....

#### WEIGHT

7.1.4. In the past 12 months, have you lost **unintentionally** at least 5 kg (**not because** of a diet or physical activity)?

Yes

No

WAIST SIZE

7.1.5. ID number of device:

7.1.6. Waist size:

,  cm

Not measured

7.1.7. The measurement has been made

- Directly on the skin**
- In underwear
- On light clothing, specify: .....
- Other, specify: .....

7.1.8. Reason why the waist size has not been measured

- Refusal
- Other, specify: .....

HIP SIZE

7.1.9. Hip size:

,  cm

Not measured

7.1.10. The measurement has been made

**In underwear**

On light clothing, specify: .....

Other, specify: .....

7.1.11. Reason why the hip size has not been measured

Refusal

Other, specify: .....

THIGH SIZE

7.1.12. **PROXIMAL** left thigh size

,  cm

Not measured

7.1.13. The measurement has been made

- Directly on the skin**
- On light clothing, specify: .....
- Other, specify: .....

7.1.14. Which thigh has been measured?

- Left
- Right

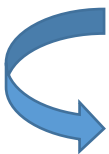

**If the right thigh has been measured**, specify the reason:

.....

7.1.15. Reason why the thigh size has not been measured

- Refusal
- Other, specify: .....

## 7.2. IMPEDANCEMETRY

*Specific vocabulary for this measurement:*

*FM - Masse grasse*

*FFM - Masse maigre*

*PMM - Masse musculaire*

7.2.1. ID of device:

7.2.2. Before starting, the study nurse checks these exclusion criteria:

|                                 | Yes                      | No                       | Not applicable           |
|---------------------------------|--------------------------|--------------------------|--------------------------|
| Period by the woman (exclusion) | <input type="checkbox"/> | <input type="checkbox"/> | <input type="checkbox"/> |
| Wearing a pacemaker             | <input type="checkbox"/> | <input type="checkbox"/> | ////////////////////     |

→ If yes, **MEASURE** the weight of the SECA scale and **CONTINUE**.

→ If no/not applicable, **SKIP TO** question 7.2.7. on the following page.

7.2.3. ID of device:

7.2.4. Weight

,  kg

7.2.5. The measurement has been made

- In underwear**
- With light clothing, specify: .....
- Other, specify: .....

7.2.6. Reason why the weight has not been measured

- Wheelchair or immobile
- Varies standing
- Refusal
- Other, specify: .....

→ **SKIP To** chapter **CARDIOLOGY** on page 30.



7.2.7. Time of measurement

|  |  |   |  |  |
|--|--|---|--|--|
|  |  | : |  |  |
|--|--|---|--|--|

Hours : Minutes

7.2.8. The analysis has been made

- In underwear, without shoes and without jewelry**
- With light clothing, specify: .....
- Other, specify: .....

7.2.9. Reason why the analysis was not carried out

- Refusal
- Other, specify: .....

*The study nurse staples the results of the impedancemetry on page 2*

## 8. CARDIOLOGY

### 8.1. BLOOD PRESSURE

8.1.1. In the past 12 months, how often was your blood pressure measured?

/ day

/ week

/ month

/ year

*Before the first measurement, the participant must remain seated and quiet for at least 5 minutes.*

8.1.2. Type of device

OMRON MX3 PLUS

OMRON M6 COMFORT

ID of device:

8.1.3. Selection of cuff

Arm measurement:  ,  cm

Cuff used:

Small-Medium for OMRON MX3 PLUS (Circumference of the arm 22-32 cm)

Large for OMRON MX3 PLUS (Circumference of the arm 32-42 cm)

Small-Medium-Large for OMRON M6 COMFORT (Circumference of the arm 22-42 cm)

8.1.4. Measurement of blood pressure on the **RIGHT** arm

Arm used:  Right  Left

*1 minute pause between each measurement.*

|                            | 1 <sup>st</sup>                                                | 2 <sup>nd</sup>                                                | 3 <sup>rd</sup>                                                |
|----------------------------|----------------------------------------------------------------|----------------------------------------------------------------|----------------------------------------------------------------|
| Systolic pressure (mmHg):  | <input type="text"/> <input type="text"/> <input type="text"/> | <input type="text"/> <input type="text"/> <input type="text"/> | <input type="text"/> <input type="text"/> <input type="text"/> |
| Diastolic pressure (mmHg): | <input type="text"/> <input type="text"/> <input type="text"/> | <input type="text"/> <input type="text"/> <input type="text"/> | <input type="text"/> <input type="text"/> <input type="text"/> |
| Pulse (/60 sec):           | <input type="text"/> <input type="text"/> <input type="text"/> | <input type="text"/> <input type="text"/> <input type="text"/> | <input type="text"/> <input type="text"/> <input type="text"/> |
| No measurement:            | <input type="checkbox"/>                                       | <input type="checkbox"/>                                       | <input type="checkbox"/>                                       |
| Error code of device:      | .....                                                          | .....                                                          | .....                                                          |

8.1.5. If you used the **LEFT** arm, give the reason

- Ganglionic problem affecting the right arm (e.g. after breast cancer)
- Right arm paralysed or spastic
- Amputation of the right arm
- Right arm in plaster
- Other, specify: .....

8.1.6. Position of the participant during blood pressure measurement

- Sitting
- Lying down

8.1.7. If the participant is lying, give the reason:

.....

.....

8.2. CARDIOVASCULAR HISTORY

8.2.1. Are you followed by a cardiologist?

- Yes
- No → **SKIP TO the question 8.2.5.**

8.2.2. If yes, do you know why you are followed by a cardiologist?

.....  
.....

8.2.3. When was the last time you consult with your cardiologist?

|                      |                      |   |                      |                      |   |                      |                      |                      |                      |
|----------------------|----------------------|---|----------------------|----------------------|---|----------------------|----------------------|----------------------|----------------------|
| <input type="text"/> | <input type="text"/> | / | <input type="text"/> | <input type="text"/> | / | <input type="text"/> | <input type="text"/> | <input type="text"/> | <input type="text"/> |
| Day                  |                      |   | Month                |                      |   | Year                 |                      |                      |                      |

8.2.4. What is the name of **your cardiologist**, so the cardiologist of the study can contact him if your ECG would be significantly abnormal?

Dr (NAME):

Forename:

Practice:

Refusal of participant

8.2.5. What is the name of **your family doctor**, so the cardiologist of the study can contact him if your ECG would be significantly abnormal?

Dr (NAME):

Forename:

Practice:

Refusal of participant

8.2.6. Did a doctor diagnose you one of the following diseases?

| (Look at Page 13 and 14)                      | Yes                      | No                       | I do not know            | Date            |
|-----------------------------------------------|--------------------------|--------------------------|--------------------------|-----------------|
| Coronary heart disease, Myocardial infarction | <input type="checkbox"/> | <input type="checkbox"/> | <input type="checkbox"/> | ___ / ___ / ___ |
| Valvular heart defect                         | <input type="checkbox"/> | <input type="checkbox"/> | <input type="checkbox"/> | ___ / ___ / ___ |
| High blood pressure                           | <input type="checkbox"/> | <input type="checkbox"/> | <input type="checkbox"/> | ___ / ___ / ___ |
| Chronic lung disease, Asthma                  | <input type="checkbox"/> | <input type="checkbox"/> | <input type="checkbox"/> | ___ / ___ / ___ |
| Diabetes                                      | <input type="checkbox"/> | <input type="checkbox"/> | <input type="checkbox"/> | ___ / ___ / ___ |
| Renal insufficiency                           | <input type="checkbox"/> | <input type="checkbox"/> | <input type="checkbox"/> | ___ / ___ / ___ |
| Anemia                                        | <input type="checkbox"/> | <input type="checkbox"/> | <input type="checkbox"/> | ___ / ___ / ___ |
| Acute rheumatic fever in childhood            | <input type="checkbox"/> | <input type="checkbox"/> | <input type="checkbox"/> | ___ / ___ / ___ |
| Other heart disease, describe please: .....   | <input type="checkbox"/> | <input type="checkbox"/> | <input type="checkbox"/> | ___ / ___ / ___ |

8.2.7. Did you have one of the following family histories?

|                                                      | Yes                      | No                       | I do not know            | Date            |
|------------------------------------------------------|--------------------------|--------------------------|--------------------------|-----------------|
| Myocardial infarction <55 years at father or brother | <input type="checkbox"/> | <input type="checkbox"/> | <input type="checkbox"/> | ___ / ___ / ___ |
| Myocardial infarction <65 years at mother or sister  | <input type="checkbox"/> | <input type="checkbox"/> | <input type="checkbox"/> | ___ / ___ / ___ |
| Stroke <45 years at parents or at brother or sister  | <input type="checkbox"/> | <input type="checkbox"/> | <input type="checkbox"/> | ___ / ___ / ___ |
| High blood pressure                                  | <input type="checkbox"/> | <input type="checkbox"/> | <input type="checkbox"/> | ___ / ___ / ___ |
| High cholesterol                                     | <input type="checkbox"/> | <input type="checkbox"/> | <input type="checkbox"/> | ___ / ___ / ___ |
| Diabetes                                             | <input type="checkbox"/> | <input type="checkbox"/> | <input type="checkbox"/> | ___ / ___ / ___ |

8.2.8. Let us return on to your habits and your lifestyle:

|                                                            |                                                                                        |                 |
|------------------------------------------------------------|----------------------------------------------------------------------------------------|-----------------|
| How many cigarettes do you smoke?                          | <input type="text"/> <input type="text"/><br><input type="text"/> <input type="text"/> | / day<br>/ week |
| How many glasses of alcohol do you drink?                  | <input type="text"/> <input type="text"/><br><input type="text"/> <input type="text"/> | / day<br>/ week |
| How many times a week do you practice a physical activity? | <input type="text"/> <input type="text"/>                                              | / week          |

8.2.9. Do you currently have the following symptoms?

|                                          | Yes                      | No                       |
|------------------------------------------|--------------------------|--------------------------|
| Chest pain                               | <input type="checkbox"/> | <input type="checkbox"/> |
| Dyspnoea/shortness of breath on exertion | <input type="checkbox"/> | <input type="checkbox"/> |
| Arrhythmia                               | <input type="checkbox"/> | <input type="checkbox"/> |
| Syncope, faintness                       | <input type="checkbox"/> | <input type="checkbox"/> |

8.3. ELECTROCARDIOGRAM

8.3.1. ID number of device:

8.3.2. ECG has been made

Yes

No

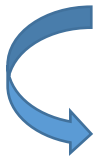

**If no**, give the reason:

Refusal

Other, specify : .....

8.3.3. If the participant wears a pacemaker, did you use a magnet in the implementation of the ECG?

Yes

No

Not applicable

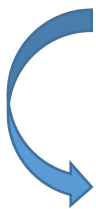

**If no**, give the reason:

Refusal

Other, specify: .....

#### 8.4. PULSE WAVE VELOCITY

*It is an examination which allows to measure the arterial rigidity by the analysis of the speed of wave pulse and the central pressure. During the whole investigation, the couch remains in a horizontal position, without pillow and without folded up back part. The resting period before carrying out the examination is 10 minutes.*

8.4.1. ID number of device:

8.4.2. The carotid-femoral PWV measurement has been carried out?

- Yes
- No

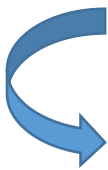

**If no**, give the reason:

- Refusal
- Other, specify: .....

8.4.3. What is the distance between the carotid and the femoral arteries?

mm

8.4.4. Blood pressure is measured 3 times on the right arm during the examination:

|                            | 1 <sup>st</sup>                                                | 2 <sup>nd</sup>                                                | 3 <sup>rd</sup>                                                |
|----------------------------|----------------------------------------------------------------|----------------------------------------------------------------|----------------------------------------------------------------|
| Systolic pressure (mmHg):  | <input type="text"/> <input type="text"/> <input type="text"/> | <input type="text"/> <input type="text"/> <input type="text"/> | <input type="text"/> <input type="text"/> <input type="text"/> |
| Diastolic pressure (mmHg): | <input type="text"/> <input type="text"/> <input type="text"/> | <input type="text"/> <input type="text"/> <input type="text"/> | <input type="text"/> <input type="text"/> <input type="text"/> |
| Pulse (/60 sec):           | <input type="text"/> <input type="text"/> <input type="text"/> | <input type="text"/> <input type="text"/> <input type="text"/> | <input type="text"/> <input type="text"/> <input type="text"/> |
| No measurement:            | <input type="checkbox"/>                                       | <input type="checkbox"/>                                       | <input type="checkbox"/>                                       |
| Error code of device:      | .....                                                          | .....                                                          | .....                                                          |



## 9. PHYSICAL FITNESS

### 10.1. FINGER TAPPING TEST

*The participant is asked to touch the sensor as fast as possible, for a period of 10 seconds. The hand is placed flat and the fingertips touch the board. It has to start with the **dominant hand** and then the non-dominant hand.*

10.1.1. ID of device:

10.1.2. The participant is:

- Right hander  
 Left hander

10.1.3. The number of keys counted by hand:

| Dominant hand |                      |           |
|---------------|----------------------|-----------|
| 1.            | <input type="text"/> | keys/10'' |
| 2.            | <input type="text"/> | keys/10'' |
| 3.            | <input type="text"/> | keys/10'' |

| NON dominant hand |                      |           |
|-------------------|----------------------|-----------|
| 1.                | <input type="text"/> | keys/10'' |
| 2.                | <input type="text"/> | keys/10'' |
| 3.                | <input type="text"/> | keys/10'' |

10.1.4. Reason why the measurement of the **RIGHT** hand has not been performed:

- Amputation: arm, hand  
 Paralysis of the arm, the hand  
 Plaster  
 Bandages  
 Operation within the 3 past months  
 Other missing fingers or fingers broken  
 Refusal  
 Other, specify: .....

10.1.5. Reason why the measurement of the **LEFT** hand has not been performed:

- Amputation: arm, hand
- Paralysis of the arm, the hand
- Plaster
- Bandages
- Operation within the 3 past months
- Other missing fingers or fingers broken
- Refusal
- Other, specify: .....

## 10.2. GRIP STRENGTH TEST

*The study nurse demonstrates the participant the test and then gives him an opportunity to try the dynamometer itself. In this way, the study nurse tests the understanding of the participant and can adjust the handle size.*

10.2.1. ID number of device

10.2.2. Have you had, **in the past 7 days**, pain or a feeling of stiffness in the **RIGHT** hand?

- Yes  
 No  
 Not applicable

10.2.3. Have you had, **in the past 7 days**, pain or a feeling of stiffness in the **LEFT** hand?

- Yes  
 No  
 Not applicable

10.2.4. Which is your dominant hand?

- Right  
 Left

10.2.5. Three measurements per hand are provided:

*1 minute pause between each measurement.*

**NON** dominant hand

|    |                      |    |
|----|----------------------|----|
| 1. | <input type="text"/> | kg |
| 2. | <input type="text"/> | kg |
| 3. | <input type="text"/> | kg |

Dominant hand

|    |                      |    |
|----|----------------------|----|
| 1. | <input type="text"/> | kg |
| 2. | <input type="text"/> | kg |
| 3. | <input type="text"/> | kg |

10.2.6. In which position, the measurements have been carried out?

|                          |                                               |
|--------------------------|-----------------------------------------------|
| <input type="checkbox"/> | <b>Standing</b>                               |
| <input type="checkbox"/> | Sitting                                       |
|                          | <b>If SITTING</b> , give the reason:<br>..... |

10.2.7. Reason why the measurement of the **RIGHT** hand has not been performed:

- Amputation: arm, hand, thumb
- Paralysis of the arm, the hand
- Plaster
- Bandages
- Operation within the 3 past months
- Other missing fingers or fingers broken
- Refusal
- Other, specify: .....

10.2.8. Reason why the measurement of the **LEFT** hand has not been performed:

- Amputation: arm, hand, thumb
- Paralysis of the arm, the hand
- Plaster
- Bandages
- Operation within the 3 past months
- Other missing fingers or fingers broken
- Refusal
- Other, specify: .....

### 10.3. BALANCE TEST

*The study nurse performs a demonstration. The test is carried out without technical assistance (cane, assistant, etc.). The participant wears preferably low-heeled shoes.*

10.3.1. Do you, in your daily life, have any problems with seeing?

*Even when wearing your glasses or contact lenses, if you are concerned.*

- Yes
- No

10.3.2. Do you, in your daily life, have any problems with hearing?

*Even when using your hearing aid, if you are concerned.*

- Yes
- No

10.3.3. Does the participant have a physical deformity preventing from joining both feet?

| Yes                      | No                       |                          |
|--------------------------|--------------------------|--------------------------|
| <input type="checkbox"/> | <input type="checkbox"/> | Genu valgum (X position) |
| <input type="checkbox"/> | <input type="checkbox"/> | Hallux valgus            |
| <input type="checkbox"/> | <input type="checkbox"/> | Strong thighs            |

10.3.4. **For the “feet together” position**, does the participant succeed in keeping all alone the position?

- Yes
- No → **SKIP TO question 10.3.22. on page 49**

10.3.5. **“Feet together” for 10 seconds:**

,  seconds

- Successful test
- Not successful test → **SKIP TO question 10.3.22. on page 49**

10.3.6. Was the participant likely to fall without the help of the nurse?

- Yes
- No

10.3.7. . **For the “semi-tandem” position**, does the participant manage alone to keep the position?

- Yes
- No → **SKIP TO question 10.3.22. on page 49**

10.3.8. „**Semi-tandem**“ for 10 seconds:

,  seconds

- Successful test
- Not successful test → **SKIP TO question 10.3.22. on page 49**

10.3.9. Was the participant likely to fall without the help of the nurse?

- Yes
- No

10.3.10. **For the “tandem complete for 70 years or more” position**, does the participant manage alone to keep the position?

- Yes
- No → **SKIP TO question 10.3.22. on page 49**

10.3.11. “Tandem complete” for 10 seconds (age 70 or more):

,  seconds

- Successful test
- Not successful test → **SKIP TO question 10.3.22. on page 49**
- Not applicable

10.3.12. Was the participant likely to fall without the help of the nurse?

Yes

No

10.3.13. For the “tandem complete for 69 years or less” position, does the participant manage alone to keep the position?

Yes

No → SKIP TO question 10.3.22. on page 49

10.3.14. “Tandem complete” for 30 seconds (age 69 or less):

,   seconds

Successful test

Not successful test → SKIP TO question 10.3.22. on page 49

Not applicable

10.3.15. Was the participant likely to fall without the help of the nurse?

Yes

No

10.3.16. For the « standing on one leg with OPEN eyes » position, does the participant manage alone to keep the position?

Yes

No → SKIP TO question 10.3.22. on page 49

10.3.17. “Standing on one leg with OPEN eyes” for 30 seconds (age 69 or less):

*The participant can try this **once**, before the test begins.*

,  seconds

Successful test

Not successful test → SKIP TO question 10.3.22. on page 49

10.3.18. Was the participant likely to fall without the help of the nurse?

Yes

No



10.3.19. For the « standing with CLOSED eyes on one leg » position, does the participant manage alone to keep the position?

- Yes
- No →SKIP TO question 10.3.22.

10.3.20. “Standing with CLOSED eyes on one leg” for 30 seconds (age 69 or less):

,   seconds

- Successful test
- Not successful test

10.3.21. Was the participant likely to fall without the help of the nurse?

- Yes
- No

10.3.22. Reason for which the balance test was not performed or is not achieved:

- Unable to stay standing alone
- Lower limb prosthesis
- Dizziness or lightheadedness
- Left foot/leg amputation
- Right foot/leg amputation
- Left toe(s) amputation
- Right toe(s) amputation
- Left foot/leg plaster
- Right foot/leg plaster
- Refusal
- Other, specify: .....

## 10.4. CHAIR RISES

*First, the participant will be asked to get up from a chair without using his arms. This test shows whether the participant got muscular strength in the hips and legs **to stand up and to sit down as fast as possible**. The less muscles are developed, the more the risk of falling is high.*

10.4.1. Did the participant succeed in rising once?

- Yes  
 No → **SKIP TO question 10.4.5.**

10.4.2. At the age of 69 years or less, 10 liftings are required:

times

,   seconds (limited time is 60 seconds)

- Successful test  
 Not successful test  
 Not applicable

10.4.3. At the age of 70 or more, 5 liftings are required:

time

,   seconds (limited time is 60 seconds)

- Successful test  
 Not successful test  
 Not applicable

10.4.4. Reason for which the test was interrupted by the study nurse:

- The participant is tired
- The participant is out of breath
- The participant used his hands

10.4.5. Reason for which the balance test was not performed :

- Unable to stay standing alone
- Lower limb prosthesis
- Dizziness or lightheadedness
- Left foot/leg amputation
- Right foot/leg amputation
- Left toe(s) amputation
- Right toe(s) amputation
- Left foot/leg plaster
- Right foot/leg plaster
- Refusal
- Other, specify: .....

## 10.5. WALKING SPEED

*For each walking test, the participant starts behind the starting line, both feet up on the starting line. The study nurse shows the participant where the 2.44 meter itinerary ends.*

10.5.1. Does the participant have one of the following contraindications?

| Yes                      | No                       |                        |
|--------------------------|--------------------------|------------------------|
| <input type="checkbox"/> | <input type="checkbox"/> | Symptomatic neuropathy |
| <input type="checkbox"/> | <input type="checkbox"/> | Symptomatic myelopathy |

10.5.2. The study nurse gives the following explanation to the participant:

*“This is our course of walk. If you use a walking aid when you go outside, you can use it for this test. I want you to walk at **your usual rhythm** between the 2 cones. Realise the whole way and stop after the cone. I will walk behind you. We will make this test twice.”*

1.   ,   seconds
2.   ,   seconds

10.5.3. Reason for which the walking speed test was not carried out:

- Unable to stay standing alone
- Fall during the test
- Dizziness or lightheadedness
- Left foot/leg amputation
- Right foot/leg amputation
- Left toe(s) amputation
- Right toe(s) amputation
- Left foot/leg plaster
- Right foot/leg plaster
- Refusal
- Other, specify: .....

## 10.6. STEP TEST

10.6.1. Before the beginning of the step test, the study nurse checks if the participant has a contraindication:

|                                                                                                                                | Yes                      | No                       |
|--------------------------------------------------------------------------------------------------------------------------------|--------------------------|--------------------------|
| Recent ECG with a significant change: ischemia, myocardial infarction within the 3 last months or another sharp cardiac event. | <input type="checkbox"/> | <input type="checkbox"/> |
| Angina pectoris                                                                                                                | <input type="checkbox"/> | <input type="checkbox"/> |
| Arrhythmias                                                                                                                    | <input type="checkbox"/> | <input type="checkbox"/> |
| History of aneurysm or stenosis                                                                                                | <input type="checkbox"/> | <input type="checkbox"/> |
| Heart failure                                                                                                                  | <input type="checkbox"/> | <input type="checkbox"/> |
| Taking beta blockers                                                                                                           | <input type="checkbox"/> | <input type="checkbox"/> |
| Sharp or chronic problems to walk or to climb up the stairs                                                                    | <input type="checkbox"/> | <input type="checkbox"/> |

→ If yes, SKIP TO chapter ACCELEROMETER on page 57.

10.6.2. ID of device

10.6.3. The test was carried out:

Yes

No → **SKIP TO question 10.6.6.**

10.6.4. Number of realised steps per minute:

in 1 minute

in 2 minutes

in 3 minutes

in 4 minutes

in 5 minutes

in 6 minutes

in 7 minutes

in 8 minutes

10.6.5. At the end of the test, the study nurse observes the pulse for 1 minute on the screen measured by Actiheart, and notes the value after 60 seconds:

/60 sec.

10.6.6. Reason why the test was not carried out:

- Dizziness or lightheadedness
- Nausea that occurred during the test
- Left foot/leg amputation
- Right foot/leg
- Left toe(s) amputation
- Right toe(s) amputation
- Left foot/leg plaster
- Right foot/leg plaster
- Refusal
- Other, specify: .....



## 10.7. ACCELEROMETER

*The study nurse tells the participant the benefits and gives the instructions how to use the accelerometer.*

*“The bracelet collects data on your physical activity as well as on your sleep patterns. You will wear it 7 days on the wrist and send it afterwards back to us, using the enclosed envelope.”*

10.7.1. ID of device

10.7.2. The participant agrees to wear the bracelet:

- Yes
- No

10.7.3. Reason why the participant prefers not to participate in this test:

- No time enough
- Risk of forgetting it
- Fear of losing it
- No desire
- Other, specify: .....

## 11. END OF NURSE APPOINTMENT

*A huge thank you for your time and participation.*

*Do not hesitate to contact us if you have any questions or concerns.*

Time at the end of the appointment:   :

Appreciation of the participant:

.....

.....

.....
