# Supplementary material for: A Formación Profesional: unha visión empresarial
Source: Springer Nature journal article supplement (doi:10.1186/s12874-019-0669-0), 1998-01-01
Supplement: MOESM2 [file 16441990]

## YOUR HOME-BASED QUESTIONNAIRE

Dear Madam, Dear Sir,

We thank you in advance for granting us a little of your time.

Preferably choose a **quiet place** in order to answer all questions to the best of your ability.

**Tick the box** below to give us your consent to this home-based questionnaire participation.

I agree to fill this questionnaire and to bring it with me to my appointment with the study nurse.

## 1. SOCIAL VARIABLES

1.01. Are you...?

- A man
- A woman

1.02. What is your date of birth?

|                      |                      |   |                      |                      |   |                      |                      |                      |                      |
|----------------------|----------------------|---|----------------------|----------------------|---|----------------------|----------------------|----------------------|----------------------|
| <input type="text"/> | <input type="text"/> | / | <input type="text"/> | <input type="text"/> | / | <input type="text"/> | <input type="text"/> | <input type="text"/> | <input type="text"/> |
| Day                  |                      |   | Month                |                      |   | Year                 |                      |                      |                      |

1.03. What is your country of birth?

|                      |                      |                      |                      |                      |                      |                      |                      |                      |                      |                      |                      |                      |                      |                      |                      |
|----------------------|----------------------|----------------------|----------------------|----------------------|----------------------|----------------------|----------------------|----------------------|----------------------|----------------------|----------------------|----------------------|----------------------|----------------------|----------------------|
| <input type="text"/> | <input type="text"/> | <input type="text"/> | <input type="text"/> | <input type="text"/> | <input type="text"/> | <input type="text"/> | <input type="text"/> | <input type="text"/> | <input type="text"/> | <input type="text"/> | <input type="text"/> | <input type="text"/> | <input type="text"/> | <input type="text"/> | <input type="text"/> |
| <input type="text"/> | <input type="text"/> | <input type="text"/> | <input type="text"/> | <input type="text"/> | <input type="text"/> | <input type="text"/> | <input type="text"/> | <input type="text"/> | <input type="text"/> | <input type="text"/> | <input type="text"/> | <input type="text"/> | <input type="text"/> | <input type="text"/> | <input type="text"/> |

1.04. What is your current, legal marital status?

- Married or in a registered life partnership (PACS)
- Widow(er)
- Divorced
- Live in a consensual union
- Single, never married
- Separated, but still legally married

1.05. What is your **highest** educational degree **obtained**?

- No diploma
- CATP – Certificate of Technical and Professionnal Aptitude
- CITP - Certificate of Technical and Professional Initiation
- CCM – Certificate of Manual Capability
- Diploma for Completion of Secondary Technical Studies
- Technician diploma
- Diploma for Completion of Secondary General Studies
- Bac +2 (BTS)
- Bac +3 (Bachelors/Degree)
- Bac +4 (Masters)
- Bac +5 and more (3rd Cycle, DEA, DESS, MBA, Masters, PhD, etc.)
- Diploma from a Grande Ecole, an Engineering School
- Other, please specify : .....

1.06. Which is your **current** activity?

- Employed
- In school, university or in training
- Unemployed or in search of employment
- Retired or in early retirement
- At home
- Invalid
- On long-term leave (for example: illness)
- On parental leave
- Other, please specify : .....

1.07. If you are employed or exercise a profession:

→ If you do not work, SKIP TO question 1.10 page 6

*This question refers to paid work. If you have several occupations, consider the main one.*

*State the exact designation of your profession, i.e. do not indicate electrician, but rather electrical contractor; instead of saleswoman indicate saleswoman for shoes.*

What is your current profession? **Describe your main task accurately!**

---

---

Please do not fill in this section!

ISCO-08

(nn)

1.08. Please use the most precise terms possible to describe the economic activity of your company:

*If you do not know this, then mention the name of your company.*

---

---

Please do not fill in this section!

NACE Rev.2

(A)

1.09. Do you have a paid job at present?

- Yes, full time
- Yes, part time
- No, → If no, SKIP to question 1.10.

**If yes**, we would like to know the type and amount of physical activity involved in your work.

*One single answer is possible.*

- Sedentary occupation: you spend most of your time sitting (such as in an office)
- Standing occupation: you spend most of your time standing or walking, but your work does not require intense physical effort (e.g., shop assistant, hairdresser, guard)
- Manual work: this involves some physical effort including handling of heavy objects and use of tools (e.g., plumber, electrician, carpenter)
- Heavy manual work: this involves very vigorous physical activity including handling very heavy objects (e.g., docker, miner, bricklayer, construction worker)

1.10. How many persons live in your household **(including yourself)**?

- Adults (over 18 years)
- Children between 14 years and 18 years
- Children under 14 years

1.11. What is your monthly or annual net **household** income?

*If you live with other people at the same postal address, add your net content with that of the other people who live with you and follow a paid-up activity, enclosed aid, pensions, profits from industrial concern and from non-commercial activities, profits from the agriculture.*

- Less than 750 Euros/month (or under 9000 Euros/year)
- 750 to 1499 Euros/month (or 9000 to 17999 Euros/year)
- 1500 to 2249 Euros/month (or 18000 à 26999 Euros/year)
- 2250 to 2999 Euros/month (or 27000 à 35999 Euros/year)
- 3000 to 4999 Euros/month (or 36000 à 59999 Euros/ year)
- 5000 to 10000 Euros/month (or 60000 à 119999 Euros/year)
- More than 10000 Euros/month (or more than 120000 Euros/year)
- I do not know
- I do not wish to answer

1.12. To what extent does your current income allow you to provide for your needs?

- Very difficult
- Fairly difficult
- Quite easily
- Very easily
- I do not wish to answer

## 2. QUALITY OF LIFE

*The following questions refer to the perception you have of your health.*

2.01. What importance do you attach to the following items in order to feel in good health?

|                                                                       | Great importance         | Enough importance        | Little importance        | No importance            |
|-----------------------------------------------------------------------|--------------------------|--------------------------|--------------------------|--------------------------|
| Sleep and sufficient rest                                             | <input type="checkbox"/> | <input type="checkbox"/> | <input type="checkbox"/> | <input type="checkbox"/> |
| Balanced meals                                                        | <input type="checkbox"/> | <input type="checkbox"/> | <input type="checkbox"/> | <input type="checkbox"/> |
| Maintain normal weight                                                | <input type="checkbox"/> | <input type="checkbox"/> | <input type="checkbox"/> | <input type="checkbox"/> |
| Participate in social and cultural activities                         | <input type="checkbox"/> | <input type="checkbox"/> | <input type="checkbox"/> | <input type="checkbox"/> |
| Control stress                                                        | <input type="checkbox"/> | <input type="checkbox"/> | <input type="checkbox"/> | <input type="checkbox"/> |
| Participate in physical activities such as exercise, sports and games | <input type="checkbox"/> | <input type="checkbox"/> | <input type="checkbox"/> | <input type="checkbox"/> |
| Live in a smoke-free environment                                      | <input type="checkbox"/> | <input type="checkbox"/> | <input type="checkbox"/> | <input type="checkbox"/> |

2.02. In general, would you say your health is :

*Only one answer is possible.*

- Excellent
- Very good
- Good
- Fair
- Poor

2.03. **Compared to one year ago**, how would you rate your health in general **now**?

*Only one answer is possible.*

- Much better now than one year ago
- Somewhat better now than one year ago
- About the same
- Somewhat worse now than one year ago
- Much worse than one year ago



2.04. The following items are about activities you might do during a typical day. Does **your health now limit you** in these activities? If so, how much?

*Only one answer per line is possible.*

|                                                                                                 | Yes, limited a lot       | Yes, limited a little    | No, not limited at all   |
|-------------------------------------------------------------------------------------------------|--------------------------|--------------------------|--------------------------|
| Vigorous activities, such as running, lifting heavy objects, participating in strenuous sports. | <input type="checkbox"/> | <input type="checkbox"/> | <input type="checkbox"/> |
| Moderate activities, such as moving a table, pushing a vacuum cleaner, bowling.                 | <input type="checkbox"/> | <input type="checkbox"/> | <input type="checkbox"/> |
| Lifting or carrying groceries.                                                                  | <input type="checkbox"/> | <input type="checkbox"/> | <input type="checkbox"/> |
| Climbing several flights of stairs.                                                             | <input type="checkbox"/> | <input type="checkbox"/> | <input type="checkbox"/> |
| Climbing one flight of stairs.                                                                  | <input type="checkbox"/> | <input type="checkbox"/> | <input type="checkbox"/> |
| Bending, kneeling, or stooping.                                                                 | <input type="checkbox"/> | <input type="checkbox"/> | <input type="checkbox"/> |
| Walking more than a mile.                                                                       | <input type="checkbox"/> | <input type="checkbox"/> | <input type="checkbox"/> |
| Walking several blocks.                                                                         | <input type="checkbox"/> | <input type="checkbox"/> | <input type="checkbox"/> |
| Walking one block.                                                                              | <input type="checkbox"/> | <input type="checkbox"/> | <input type="checkbox"/> |
| Bathing or dressing yourself.                                                                   | <input type="checkbox"/> | <input type="checkbox"/> | <input type="checkbox"/> |

2.05. During the **past 4 weeks**, have you had any of the following problems with your work or other regular daily activities as a result of your **PHYSICAL health**?

*Answer: yes or no at each line.*

|                                                                                             | Yes                      | No                       |
|---------------------------------------------------------------------------------------------|--------------------------|--------------------------|
| Cut down the amount of time you spent on work or other activities.                          | <input type="checkbox"/> | <input type="checkbox"/> |
| Accomplished less than you would like.                                                      | <input type="checkbox"/> | <input type="checkbox"/> |
| Were limited in the kind of work or other activities.                                       | <input type="checkbox"/> | <input type="checkbox"/> |
| Had difficulty performing the work or other activities (for example, it took extra effort). | <input type="checkbox"/> | <input type="checkbox"/> |

2.06. During the **past 4 weeks**, have you had any of the following problems with your work or other regular daily activities as a result of any **EMOTIONAL problems** (such as feeling depressed or anxious)?

*Answer: yes or no at each line.*

|                                                                    | Yes                      | No                       |
|--------------------------------------------------------------------|--------------------------|--------------------------|
| Cut down the amount of time you spent on work or other activities. | <input type="checkbox"/> | <input type="checkbox"/> |
| Accomplished less than you would like.                             | <input type="checkbox"/> | <input type="checkbox"/> |
| Did not do work or other activities as carefully as usual.         | <input type="checkbox"/> | <input type="checkbox"/> |

2.07. During the **past 4 weeks**, to what extent has your **physical health or emotional problems** interfered with your normal social activities with family, friends, neighbors, or groups? *Only one answer is possible.*

- Not at all
- Slightly
- Moderately
- Quite a bit
- Extremely

2.08. How much **bodily pain** have you had during the **past 4 weeks**?

*Only one answer possible.*

- None
- Very mild
- Mild
- Moderate
- Severe
- Very severe

2.09. During the **past 4 weeks**, how much did **pain** interfere with your normal work (including work outside the home and housework)?

*Only one answer is possible.*

- Not at all
- A little bit
- Moderately
- Quite a bit
- Extremely

The following 9 questions are about how you feel and how things have been with you during the last 4 weeks. For each question, please give the one answer that comes closest to the way you have been feeling.

2.10. How much of the time during the **past 4 weeks...**:

*Only one answer per line is possible.*

|                                                                     | All of the time          | Most of the time         | A good bit of the time   | Some of the time         | A little bit of the time | None of the time         |
|---------------------------------------------------------------------|--------------------------|--------------------------|--------------------------|--------------------------|--------------------------|--------------------------|
| Did you feel full of pep?                                           | <input type="checkbox"/> | <input type="checkbox"/> | <input type="checkbox"/> | <input type="checkbox"/> | <input type="checkbox"/> | <input type="checkbox"/> |
| Have you been a very nervous person?                                | <input type="checkbox"/> | <input type="checkbox"/> | <input type="checkbox"/> | <input type="checkbox"/> | <input type="checkbox"/> | <input type="checkbox"/> |
| Have you felt so down in the dumps that nothing could cheer you up? | <input type="checkbox"/> | <input type="checkbox"/> | <input type="checkbox"/> | <input type="checkbox"/> | <input type="checkbox"/> | <input type="checkbox"/> |
| Have you felt calm and peaceful?                                    | <input type="checkbox"/> | <input type="checkbox"/> | <input type="checkbox"/> | <input type="checkbox"/> | <input type="checkbox"/> | <input type="checkbox"/> |
| Did you have a lot of energy?                                       | <input type="checkbox"/> | <input type="checkbox"/> | <input type="checkbox"/> | <input type="checkbox"/> | <input type="checkbox"/> | <input type="checkbox"/> |
| Have you felt downhearted and blue?                                 | <input type="checkbox"/> | <input type="checkbox"/> | <input type="checkbox"/> | <input type="checkbox"/> | <input type="checkbox"/> | <input type="checkbox"/> |
| Did you feel worn out?                                              | <input type="checkbox"/> | <input type="checkbox"/> | <input type="checkbox"/> | <input type="checkbox"/> | <input type="checkbox"/> | <input type="checkbox"/> |
| Have you been a happy person?                                       | <input type="checkbox"/> | <input type="checkbox"/> | <input type="checkbox"/> | <input type="checkbox"/> | <input type="checkbox"/> | <input type="checkbox"/> |
| Did you feel tired?                                                 | <input type="checkbox"/> | <input type="checkbox"/> | <input type="checkbox"/> | <input type="checkbox"/> | <input type="checkbox"/> | <input type="checkbox"/> |

2.11. During the **past 4 weeks**, how much of the time has your **physical health or emotional problems** interfered with your social activities (like visiting with friends, relatives, etc.)?

*Only one answer is possible.*

- All of the time     
  Most of the time     
  Some of the time     
  A little of the time     
  None of the time

2.12. How **TRUE or FALSE** is **each** of the following statements for you?

*Only one answer per line is possible.*

|                                                       | Definitely true          | Mostly true              | Do not know              | Mostly false             | Definitely false         |
|-------------------------------------------------------|--------------------------|--------------------------|--------------------------|--------------------------|--------------------------|
| I seem to get sick a little easier than other people. | <input type="checkbox"/> | <input type="checkbox"/> | <input type="checkbox"/> | <input type="checkbox"/> | <input type="checkbox"/> |
| I am as healthy as anybody I know.                    | <input type="checkbox"/> | <input type="checkbox"/> | <input type="checkbox"/> | <input type="checkbox"/> | <input type="checkbox"/> |
| I expect my health to get worse.                      | <input type="checkbox"/> | <input type="checkbox"/> | <input type="checkbox"/> | <input type="checkbox"/> | <input type="checkbox"/> |
| My health is excellent.                               | <input type="checkbox"/> | <input type="checkbox"/> | <input type="checkbox"/> | <input type="checkbox"/> | <input type="checkbox"/> |

### 3. MENTAL WELL-BEING

3.01. During the past week:

*Only one answer per line is possible.*

|                                                                                       | Rarely or none of the time (less than 1 day) | Some or a little of the time (1 to 2 days) | Occasionally or a moderate amount of the time (3 to 4 days) | Most or all of the time (5 to 7 days) |
|---------------------------------------------------------------------------------------|----------------------------------------------|--------------------------------------------|-------------------------------------------------------------|---------------------------------------|
| I was bothered by things that usually do not bother me.                               | <input type="checkbox"/>                     | <input type="checkbox"/>                   | <input type="checkbox"/>                                    | <input type="checkbox"/>              |
| I did not feel like eating; my appetite was poor.                                     | <input type="checkbox"/>                     | <input type="checkbox"/>                   | <input type="checkbox"/>                                    | <input type="checkbox"/>              |
| I felt that I could not shake off the blues even with help from my family or friends. | <input type="checkbox"/>                     | <input type="checkbox"/>                   | <input type="checkbox"/>                                    | <input type="checkbox"/>              |
| I felt I was just as good as other people.                                            | <input type="checkbox"/>                     | <input type="checkbox"/>                   | <input type="checkbox"/>                                    | <input type="checkbox"/>              |
| I had trouble keeping my mind on what I was doing.                                    | <input type="checkbox"/>                     | <input type="checkbox"/>                   | <input type="checkbox"/>                                    | <input type="checkbox"/>              |
| I felt depressed.                                                                     | <input type="checkbox"/>                     | <input type="checkbox"/>                   | <input type="checkbox"/>                                    | <input type="checkbox"/>              |
| I felt that everything I did was an effort.                                           | <input type="checkbox"/>                     | <input type="checkbox"/>                   | <input type="checkbox"/>                                    | <input type="checkbox"/>              |
| I felt hopeful about the future.                                                      | <input type="checkbox"/>                     | <input type="checkbox"/>                   | <input type="checkbox"/>                                    | <input type="checkbox"/>              |
| I thought my life had been a failure.                                                 | <input type="checkbox"/>                     | <input type="checkbox"/>                   | <input type="checkbox"/>                                    | <input type="checkbox"/>              |

|                                | Rarely or none of the time (less than 1 day) | Some or a little of the time (1 to 2 days) | Occasionally or a moderate amount of the time (3 to 4 days) | Most or all of the time (5 to 7 days) |
|--------------------------------|----------------------------------------------|--------------------------------------------|-------------------------------------------------------------|---------------------------------------|
| I felt fearful.                | <input type="checkbox"/>                     | <input type="checkbox"/>                   | <input type="checkbox"/>                                    | <input type="checkbox"/>              |
| My sleep was restless.         | <input type="checkbox"/>                     | <input type="checkbox"/>                   | <input type="checkbox"/>                                    | <input type="checkbox"/>              |
| I was happy.                   | <input type="checkbox"/>                     | <input type="checkbox"/>                   | <input type="checkbox"/>                                    | <input type="checkbox"/>              |
| I talked less than usual.      | <input type="checkbox"/>                     | <input type="checkbox"/>                   | <input type="checkbox"/>                                    | <input type="checkbox"/>              |
| I felt lonely.                 | <input type="checkbox"/>                     | <input type="checkbox"/>                   | <input type="checkbox"/>                                    | <input type="checkbox"/>              |
| People were unfriendly.        | <input type="checkbox"/>                     | <input type="checkbox"/>                   | <input type="checkbox"/>                                    | <input type="checkbox"/>              |
| I enjoyed life.                | <input type="checkbox"/>                     | <input type="checkbox"/>                   | <input type="checkbox"/>                                    | <input type="checkbox"/>              |
| I had crying spells.           | <input type="checkbox"/>                     | <input type="checkbox"/>                   | <input type="checkbox"/>                                    | <input type="checkbox"/>              |
| I felt sad.                    | <input type="checkbox"/>                     | <input type="checkbox"/>                   | <input type="checkbox"/>                                    | <input type="checkbox"/>              |
| I felt that people dislike me. | <input type="checkbox"/>                     | <input type="checkbox"/>                   | <input type="checkbox"/>                                    | <input type="checkbox"/>              |
| I could not get "going".       | <input type="checkbox"/>                     | <input type="checkbox"/>                   | <input type="checkbox"/>                                    | <input type="checkbox"/>              |

#### 4. SOCIAL SUPPORT

4.01. How many persons are so close to you that you can count on them if you have serious personal problems?

- None
- 1 or 2
- 3 to 5
- 6 or more

4.02. How much concern do people show in what you are doing?

- A lot
- Enough
- Uncertain (this is to say: neither little nor much concern and interest)
- Little
- Not at all

4.03. How easy is it to get practical help from neighbours if you should need it?

- Very easy
- Easy
- Possible
- Difficult
- Very difficult



## 5. NUTRITIONAL HABITS

5.01. Are you currently on a diet?

- Yes  
 No → **If No, SKIP to question 5.02.**

**If yes, for what reason?** *Several answers possible.*

- To lower my blood pressure  
 To reduce my cholesterol level  
 To reduce my blood sugar level  
 To lose weight  
 To keep in shape  
 Coeliac disease  
 Gluten/Lactose intolerance  
 Other, please specify: .....

5.02. Over **the past 2 weeks**, how often have you had poor appetite or overeating?

- Not at all  
 Several days  
 More than half the days  
 Nearly every day

5.03. Do you use spices and/or herbs in your cooking?

*For example: basil, mixed herbs (herbes de Provence), coriander, cumin, etc.*

- Yes, always  
 Yes, from time to time  
 No, never  
 I do not know, I do not cook

5.04. Do you use salt and/or stock cubes, Aromat, Maggi **to prepare your meals?**

- Yes, salt only
- Yes, salt and other flavorings
- No, I add nothing
- I do not know, I do not cook

5.05. Do you put salt in your food **before eating?**

- Yes, always
- Yes, from time to time
- No, never

5.06. What meals or snacks do you eat **every day?**

*If you are neither working nor studying, answer only for "Rest days".*

|                          | Work days                                                | Rest days                                                |
|--------------------------|----------------------------------------------------------|----------------------------------------------------------|
| Breakfast in the morning | <input type="checkbox"/> Yes <input type="checkbox"/> No | <input type="checkbox"/> Yes <input type="checkbox"/> No |
| Mid-morning snack        | <input type="checkbox"/> Yes <input type="checkbox"/> No | <input type="checkbox"/> Yes <input type="checkbox"/> No |
| Lunch                    | <input type="checkbox"/> Yes <input type="checkbox"/> No | <input type="checkbox"/> Yes <input type="checkbox"/> No |
| Afternoon snack          | <input type="checkbox"/> Yes <input type="checkbox"/> No | <input type="checkbox"/> Yes <input type="checkbox"/> No |
| Dinner                   | <input type="checkbox"/> Yes <input type="checkbox"/> No | <input type="checkbox"/> Yes <input type="checkbox"/> No |
| After-dinner snack       | <input type="checkbox"/> Yes <input type="checkbox"/> No | <input type="checkbox"/> Yes <input type="checkbox"/> No |

5.07. In general, how many times per week do you eat **pre-cooked dishes?**

time(s)/week

5.08. Do you do the food shopping by yourself?

- Yes, always
- Yes, from time to time
- No, never → **SKIP TO the chapter PHYSICAL ACTIVITY on page 21**

5.09. **When you do the shopping,** do you look at the nutritional information on food packaging?

- Yes, always
- Yes, from time to time

No, never → **SKIP TO the chapter PHYSICAL ACTIVITY on page 21**

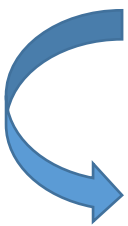

**If yes, does it influence your food purchase?**

- Yes, always
- Yes, from time to time

No, never → **SKIP TO the chapter PHYSICAL ACTIVITY on page 21**

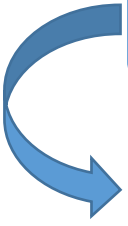

**If yes, what message on the packaging tends to make you buy a product?**

*More than one answer possible.*

- “Light” or “For diabetics” headings
- Calorie content and nutritional values
- List of ingredients
- Specific product characteristics (for example rich in Omega 3 or low cholesterol)
- Other, please specify: .....

## 6. PHYSICAL ACTIVITY

The first questions concern the time that you have spent being physically active **during the last week**. This includes the last seven days up to yesterday (including the weekend). Answer all questions, even if you do not think that you are an active person. This includes activities at work or at school, at your home or in your garden, in your travels, or during your moments of relaxation or during sports.

The time spent doing **INTENSE** physical activities

This means the activities that require serious physical effort from you, and which made you **breathe with MUCH MORE difficulty than normal**. For example, think of the times when you have carried heavy loads, dug in your garden, gone mountain biking or played soccer.

**Do not include walking!**

6.01. During the last week, including the weekend, on how many days did you engage in these types of **intense physical activities** for at least **10 consecutive minutes**?

days / 7 days → If 0 day, SKIP to question 6.03.

Do not know → SKIP to question 6.03.

6.02. Now think about **1** of these days during last week when you engaged in one or more **intense physical activities**. How much time in total did you spend at it?

:

Hours : Minutes

Do not know → SKIP to question 6.03.

## The time spent doing **MODERATE** physical activities

*This means activities which require moderate physical effort from you, and which make you **breathe with a LITTLE MORE difficulty than normal**. Think of times for example when you carried light loads (5-10 Kg), you vacuumed, or you calmly rode a bicycle, or even played volleyball.*

*Do not include walking!*

6.03. During the last week, including the weekend, on how many days did you engage in this type of **moderate physical activity** for at least **10 consecutive minutes**?

days / 7 days → If 0 day, SKIP to question 6.05.

Do not know → SKIP to question 6.05.

6.04. Now think about **1** of these days during last week when you engaged in one or more **moderate physical activities**. How much time in total did you spend at it?

:

Hours : Minutes

Do not know → SKIP to question 6.05.

## Time spent **WALKING**

*We are now going to see how much time you spent walking during last week. This includes walking at work, at school or around the house, walking to move from one place to another, and any other type of walking that you did for relaxation, for sports, for exercise or for pleasure.*

6.05. During the last week, including the weekend, on how many days did you **walk** for at least **10 consecutive minutes**?

days / 7 days → If 0 day, SKIP to question 6.07.

Do not know → SKIP to question 6.07.

6.06. Now, think about **1** of these days during last week when you walked.  
How much time in total did you **walk**?

:

Hours : Minutes

Do not know → **SKIP to question 6.07.**

6.07. In general, at what speed did you walk?

- At a lively pace which made you breathe with much more difficulty than normal.
- At a moderate pace which made you breathe with a little more difficulty than normal.
- At a slow pace, which did not involve any change in your breathing.

### The time you spent **SITTING**

*This question concerns the time that you spent daily sitting **during the last week** including at work, around the house, at school and during your relaxation time. This does not include days last weekend. It may, for example, include time spent sitting at the office, on transportation, at friends', reading, or sitting or laying down to watch television or use a computer.*

6.08. **During the last 7 days** (without taking the weekend into account), how much time did you spend sitting during a normal day?

*Including time spent at home or at your place of work or study.*

:   / day

Hours : Minutes

Do not know

6.09. **During the last 7 days**, how much time did you spend watching television (including DVD) during a ...?

| WORKING day                                                                                                   | REST day                                                                                                      |
|---------------------------------------------------------------------------------------------------------------|---------------------------------------------------------------------------------------------------------------|
| <input type="text"/> <input type="text"/> : <input type="text"/> <input type="text"/> /day<br>Hours : Minutes | <input type="text"/> <input type="text"/> : <input type="text"/> <input type="text"/> /day<br>Hours : Minutes |
| <input type="checkbox"/> Do not know<br><input type="checkbox"/> Not applicable                               | <input type="checkbox"/> Do not know                                                                          |

6.10. **During the last 7 days**, how much time did you spend at home, in front of a computer including Internet, video game console, visiting websites, checking emails, going on Facebook, Twitter, Netlog; a ...?

| WORKING day                                                                                                    | REST day                                                                                                       |
|----------------------------------------------------------------------------------------------------------------|----------------------------------------------------------------------------------------------------------------|
| <input type="text"/> <input type="text"/> : <input type="text"/> <input type="text"/> /day<br>Heures : Minutes | <input type="text"/> <input type="text"/> : <input type="text"/> <input type="text"/> /day<br>Heures : Minutes |
| <input type="checkbox"/> Do not know<br><input type="checkbox"/> Not applicable                                | <input type="checkbox"/> Do not know                                                                           |

6.11. Do you normally do sport?

- Yes  
 No → **SKIP TO question 6.13.**

6.12. Which kind of sport do you do?

|                      |                      |                      |                      |                      |                      |                      |                      |                      |                      |                      |                      |                      |                      |                      |                      |                      |
|----------------------|----------------------|----------------------|----------------------|----------------------|----------------------|----------------------|----------------------|----------------------|----------------------|----------------------|----------------------|----------------------|----------------------|----------------------|----------------------|----------------------|
| <input type="text"/> | <input type="text"/> | <input type="text"/> | <input type="text"/> | <input type="text"/> | <input type="text"/> | <input type="text"/> | <input type="text"/> | <input type="text"/> | <input type="text"/> | <input type="text"/> | <input type="text"/> | <input type="text"/> | <input type="text"/> | <input type="text"/> | <input type="text"/> | <input type="text"/> |
| <input type="text"/> | <input type="text"/> | <input type="text"/> | <input type="text"/> | <input type="text"/> | <input type="text"/> | <input type="text"/> | <input type="text"/> | <input type="text"/> | <input type="text"/> | <input type="text"/> | <input type="text"/> | <input type="text"/> | <input type="text"/> | <input type="text"/> | <input type="text"/> | <input type="text"/> |

→ **SKIP TO chapter SLEEP QUALITY on page 26 ...**

6.13. If you do not normally do any kind of sport, what are the reasons?

*More than one response possible.*

- I am not fond of sport
- Because of health problems
- For professional reasons
- Due to age
- For lack of time
- Other, please specify: .....



## 7. SLEEP QUALITY

*The following questions relate to your usual sleep habits during the past month only. Your answers should indicate the most accurate reply for the majority of days and nights in the past month.*

*Please answer all questions.*

7.01. Do you have a job or a professional occupation with different cycles or working timetables (e.g., confectioner, night-shift nurse, truck driver, cashier in a hypermarket, etc.)?

Yes

No

7.02. During the **past month**, what time have you usually gone to bed **at night**?

Bed time:   :    
Hours : Minutes

7.03. During the **past month**, how long (in minutes) has it usually taken you to fall asleep each night?

Number of minutes:

7.04. During the **past month**, what time have you usually gotten up in the morning?

Getting up time:   :    
Hours : Minutes

7.05. During the **past month**, how many hours of actual sleep did you get at night?

*This number may be different from the number of hours you spent in bed.*

Hours of sleep per night:   :    
Hours : Minutes

For each of the remaining questions, check the one best response. Please answer all the questions.

7.06. During the **past month**, how often have you had trouble sleeping because you...

|                                                                     | Not during the past month | Less than once a week    | Once or twice a week     | Three or more times a week |
|---------------------------------------------------------------------|---------------------------|--------------------------|--------------------------|----------------------------|
| Cannot get to sleep within 30 minutes.                              | <input type="checkbox"/>  | <input type="checkbox"/> | <input type="checkbox"/> | <input type="checkbox"/>   |
| Wake up in the middle of the night or early morning.                | <input type="checkbox"/>  | <input type="checkbox"/> | <input type="checkbox"/> | <input type="checkbox"/>   |
| Have to get up to use the bathroom.                                 | <input type="checkbox"/>  | <input type="checkbox"/> | <input type="checkbox"/> | <input type="checkbox"/>   |
| Cannot breath comfortably.                                          | <input type="checkbox"/>  | <input type="checkbox"/> | <input type="checkbox"/> | <input type="checkbox"/>   |
| Cough or snore loudly.                                              | <input type="checkbox"/>  | <input type="checkbox"/> | <input type="checkbox"/> | <input type="checkbox"/>   |
| Feel too cold.                                                      | <input type="checkbox"/>  | <input type="checkbox"/> | <input type="checkbox"/> | <input type="checkbox"/>   |
| Feel too hot.                                                       | <input type="checkbox"/>  | <input type="checkbox"/> | <input type="checkbox"/> | <input type="checkbox"/>   |
| Had bad dreams.                                                     | <input type="checkbox"/>  | <input type="checkbox"/> | <input type="checkbox"/> | <input type="checkbox"/>   |
| Have pain.                                                          | <input type="checkbox"/>  | <input type="checkbox"/> | <input type="checkbox"/> | <input type="checkbox"/>   |
| Other reasons, please describe:<br>.....<br>.....<br>.....<br>..... | <input type="checkbox"/>  | <input type="checkbox"/> | <input type="checkbox"/> | <input type="checkbox"/>   |

7.07. During the **past month**, how would you rate your sleep quality overall?

- Very good
- Fairly good
- Fairly bad
- Very bad

7.08. During the **past month**, how often have you taken medicine to help you sleep (prescribed or “over the counter”)?

- Not during the past month
- Less than once a week
- Once or twice a week
- Three or more times a week

7.09. During the **past month**, how often have you had trouble staying awake while driving, eating meals or engaging on social activity?

- Not during the past month
- Less than once a week
- Once or twice a week
- Three or more times a week

7.10. During the **past month**, how much of a problem has it been for you to keep up enough enthusiasm to get things done?

- No problem at all
- Only a very slight problem
- Somewhat of a problem
- A very big problem

7.11. Do you have a bed partner or room mate?

- No bed partner or room mate. → **SKIP TO chapter INTAKE OF VITAMIN D on page 30**
- Partner/room mate in other room.
- Partner in same room, but not same bed.
- Partner in same bed.

7.12. If you have a room mate or bed partner, ask him/her how often **in the past month** you have had:

|                                                                                 | Not during the past month | Less than once a week    | Once or twice a week     | Three or more times a week |
|---------------------------------------------------------------------------------|---------------------------|--------------------------|--------------------------|----------------------------|
| Loud snoring                                                                    | <input type="checkbox"/>  | <input type="checkbox"/> | <input type="checkbox"/> | <input type="checkbox"/>   |
| Long pauses between breaths while asleep                                        | <input type="checkbox"/>  | <input type="checkbox"/> | <input type="checkbox"/> | <input type="checkbox"/>   |
| Legs twitching or jerking while you sleep                                       | <input type="checkbox"/>  | <input type="checkbox"/> | <input type="checkbox"/> | <input type="checkbox"/>   |
| Episodes of disorientation or confusion during sleep                            | <input type="checkbox"/>  | <input type="checkbox"/> | <input type="checkbox"/> | <input type="checkbox"/>   |
| Other restlessness while you sleep, please describe:<br>.....<br>.....<br>..... | <input type="checkbox"/>  | <input type="checkbox"/> | <input type="checkbox"/> | <input type="checkbox"/>   |

## 8. INTAKE OF VITAMIN D

8.01. Do you go under the solarium?

- Never
- Less than 10 sessions per year
- Between 10 and 50 sessions per year
- More than 50 sessions per year

8.02. Do you go out in the sun, when it is nice? (at least uncovered arms and legs)?

|                                  | Never                    | Rarely                   | Sometimes                | Often                    | Always                   |
|----------------------------------|--------------------------|--------------------------|--------------------------|--------------------------|--------------------------|
| During the year                  | <input type="checkbox"/> | <input type="checkbox"/> | <input type="checkbox"/> | <input type="checkbox"/> | <input type="checkbox"/> |
| When you are on holiday (abroad) | <input type="checkbox"/> | <input type="checkbox"/> | <input type="checkbox"/> | <input type="checkbox"/> | <input type="checkbox"/> |

8.03. When you go out into the sun, do you use some sun-protection cream?

- Never → **SKIP TO chapter THYROID HEALTH on page 31**
- Rarely
- Sometimes
- Often
- Always

8.04. What is its indication of protection UV?

- 4 to 12
- 15 to 25
- 30 to 50
- More than 50
- I do not know

## 9. THYROID HEALTH

9.01. Have you ever had any thyroid problems diagnosed by a medical doctor?

Yes

No → **SKIP TO chapter HEALTH OF DIGESTIVE PROCESS on page 32**

9.02. Have you ever been operated for a thyroid problem?

Yes

No → **SKIP TO chapter HEALTH OF DIGESTIVE PROCESS on page 32**

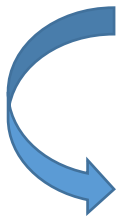

**If yes, have you had any surgery in the last 12 months?**

Yes

No

Do you know why you have been operated?

.....

I do not know

## 10. HEALTH OF DIGESTIVE PROCESS

*Constipation is hard, dry, lumpy stools that are difficult or painful to pass and which may be accompanied by bloating and discomfort.*

10.1. What is the frequency of bowel movements?

- Each day
- Every 2 days
- 2 times per week
- Once per week
- Less than once per week
- Less than once per month

10.2. At what frequency do you have difficulty in having a bowel movement (painful evacuation effort)?

- Never
  - Rarely
  - Sometimes
  - Usually
  - Always
- ➔ **SKIP TO chapter POLLUTION on page 34**

10.3. Do you use any type of assistance to have a bowel movement?

- Without assistance
- Stimulative laxatives
- Digital assistance or enema

10.4. How much time do you spend on lavatory per attempt?

- Less than 5 minutes
- Between 5 and 10 minutes
- Between 10 and 20 minutes
- Between 20 and 30 minutes
- More than 30 minutes

10.5. How many unsuccessful attempts for evacuation do you have per 24 hours?

- 0 times/day
- 1 to 3 times/day
- 4 to 6 times/day
- 7 to 9 times/day
- More than 9 times/day

10.6. At what frequency do you note a feeling of incomplete evacuation?

- Never
- Rarely
- Sometimes
- Usually
- Always

10.7. How often do you have abdominal pain?

- Never
- Rarely
- Sometimes
- Usually
- Always

10.8. What is the duration of constipation?

- Less than 1 year
- Between 1 and 5 years
- Between 5 and 10 years
- Between 10 and 20 years
- More than 20 years



## 11. POLLUTION

### WORKING AND LIVING CONDITIONS

*The next set of questions is on your working and living conditions. This information will allow us to see if the environmental living and working conditions have an impact on health.*

11.01. When has the building you live in been built?

- Less than 10 years ago
- Between 10 years and 30 years ago
- Over 30 years ago
- I do not know

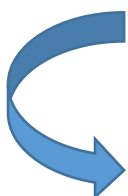

If the building is **over 30 years** old, can you state exactly how old it is?

- years and   months
- I do not know

11.02. For how many years do you live in the current accommodation?

years

11.03. Do you apply external treatments against fleas and ticks to your domestic animals?

- Yes
- No
- I do not have any domestic animals

11.04. Do you use pesticides (for example herbicides, insecticides, fungicides, etc.) inside your home?

- Yes
- No → **SKIP TO question 11.05.**

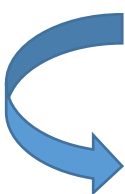

**If yes**, for which purpose are you using them? *More than one response possible.*

- To treat my plants
- Against flies, mosquitoes, spiders, cockroaches, moths, etc.
- Others, please specify: .....

11.05. Do you use pesticides in your garden?

- Yes
- No
- I do not have a garden

11.06. How far do you live from a heavy traffic road?

- Less than 100 m
- More than 100 m and less than 500 m
- More than 500 m → **SKIP TO the instruction at the end of this page**

11.07. What kind of road is it?

- Motorway / Highway
- Main road in town or urban area
- Main road outside town or urban area
- Other, please specify: .....

**INSTRUCTION:**

If you do not have a job or any professional occupation → **SKIP TO question 11.14. on page 38**

11.08. If you have a job or any professional occupation, what is your present working address (street and city)?

Street: .....

City: .....

11.09. Is it part of your job to commute regularly or daily to another place to do there your work (for example a nurse aide in home care, a taxi driver, a bricklayer at different construction sites, etc.)?

Yes

No

11.10. If you have a job or any professional occupation, how far do you work from a heavy traffic road?

Less than 100 m

More than 100 m and less than 500 m

More than 500 m → **SKIP TO question 11.12.**

11.11. What kind of road is it?

Motorway / Highway

Main road in town or urban area

Main road outside town or urban area

Other, please specify: .....

11.12. How do you travel to work?

*If you use more than one means of transportation, please indicate the most frequent or the one you spend most time in.*

Example1: 10 minutes by car, 60 minutes by bus => check the bus

Example2: 30 minutes by car and 30 minutes by train => write down in "Other"  
"car + train".

- Car
- Bus
- Train
- Bike
- On foot
- Working address and residential address the same
- Other, please specify: .....

11.13. How much time do you need **to travel to work and back from work** every day?

|                      |                      |   |                      |                      |       |
|----------------------|----------------------|---|----------------------|----------------------|-------|
| <input type="text"/> | <input type="text"/> | : | <input type="text"/> | <input type="text"/> | / day |
| Hours                |                      | : | Minutes              |                      |       |

11.14. Have you worked, in the **last 12 months**, in one or more of the following sectors?

1. Public construction and open air
2. Industry
3. Transportation
4. Catering industry and entertainment

*For the unemployed persons, the pensioners and the persons in professional training: note please the last domain.*

Yes  
 No → **If no, SKIP TO chapter TOBACCO on page 40**

 **If yes, more than one response is possible:**

**1. Public construction and open air:**

- Road maintenance (work with bitumen, asphalt, etc.)
- City maintenance
- Maintenance of green spaces
- Landscape gardener
- Lumberjack, Woodcutter
- Agriculture, viticulture
- Building sites
- Traffic and parking checks, inspection
- Terraces / cafés close to road
- Other, please specify: .....

**2. Industry:**

- Mines
- Metallurgy: iron, steel, aluminium
- Energie: fuel smelter or recycling (gasoline, diesel, etc.)
- Car: car construction, tire production, car repair shop, vehicle inspection
- Chemical / plastics
- Incinerator: rubbish, waste, wood, etc.
- Other, please specify: .....

**3. Transportation:**

- Truck driver
- Bus driver or taxi driver
- Salesman in town, deliverer
- Other, please specify: .....

**4. Catering industry, entertainment:**

- Cook
- Waiter, barman
- Swimming pool: maintenance, instructor
- Other, please specify: .....

## 12. TOBACCO

12.01. Do you currently smoke (all kind of tobacco including)?

- Yes, every day, at least 1 cigarette / day → **SKIP TO question 12.05.**
- Yes, from time to time, less than 1 cigarette / day → **SKIP TO question 12.05.**
- Yes, but only electronic cigarettes
- No

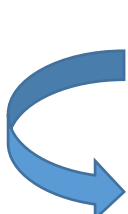

Have you smoked in the past?

- Yes → **SKIP TO question 12.02.**
- No → **SKIP TO chapter ALCOHOL on page 44**

### FOR PAST SMOKERS

12.02. If you no longer smoke, for how many years did you smoke?

years

12.03. If you no longer smoke, how many cigarettes did you smoke per day on average?

cigarette(s)/ day

12.04. If you no longer smoke, before how many years did you stop?

years → **SKIP TO question 12.14 on page 43**

## FOR REGULAR SMOKERS

12.05. How soon after you wake up do you smoke your first cigarette?

- Within 5 minutes
- 6 to 30 minutes
- 31 to 60 minutes
- After 60 minutes

12.06. Do you find it difficult to refrain from smoking in places where it is forbidden (e.g., at the library, cinema)?

- Yes
- No

12.07. Which cigarette would you hate most to give up?

- The first one in the morning
- All others

12.08. How many cigarettes per day do you smoke?

- 10 or less
- 11 to 20
- 21 to 30
- 31 or more

12.09. Do you smoke more frequently during the first hours of waking up than during the rest of the day?

- Yes
- No

12.10. Do you smoke if you are so ill that you are in bed most of the day?

- Yes



No

12.11. Have you already considered giving up tobacco?

Yes

No → **SKIP TO question 12.13.**

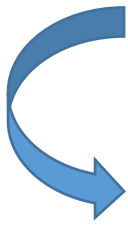

**If yes, how many times?**

Once

Twice

3 times

If more, specify:   times

12.12. During your **last attempt** how long did you go without smoking?

days

weeks

months

years

12.13. Are you concerned about the harmful effects that the tobacco that you smoke may have on your own health?

Very concerned

Fairly concerned

Slightly concerned

Not at all concerned

12.14. What was the main reason that you started smoking?

I wanted to smoke

Advertising

My spouse smokes

My friends

My parents

Other, please specify: .....

12.15. What is (or will be) the main reason leading you (or that will lead you) to stop smoking?

- Fear of falling ill
- The birth of a child, pregnancy
- The price of cigarettes
- Getting sick or a health problem
- Anti-smoking campaign
- Family
- People around you besides family, friends, colleagues
- Awareness of the consequences of tobacco on health
- General environment with regard to tobacco, social image
- No particular reason
- Do not know
- Other, please specify: .....

## 13. ALCOHOL

13.01. Have you ever consumed alcohol, apart from a few sips or trials?

Yes

No, not in my whole life → **SKIP TO page 49**

13.02. How **old** were you when you have consumed an alcoholic drink **for the first time?**

years

*Please continue on the following page...*

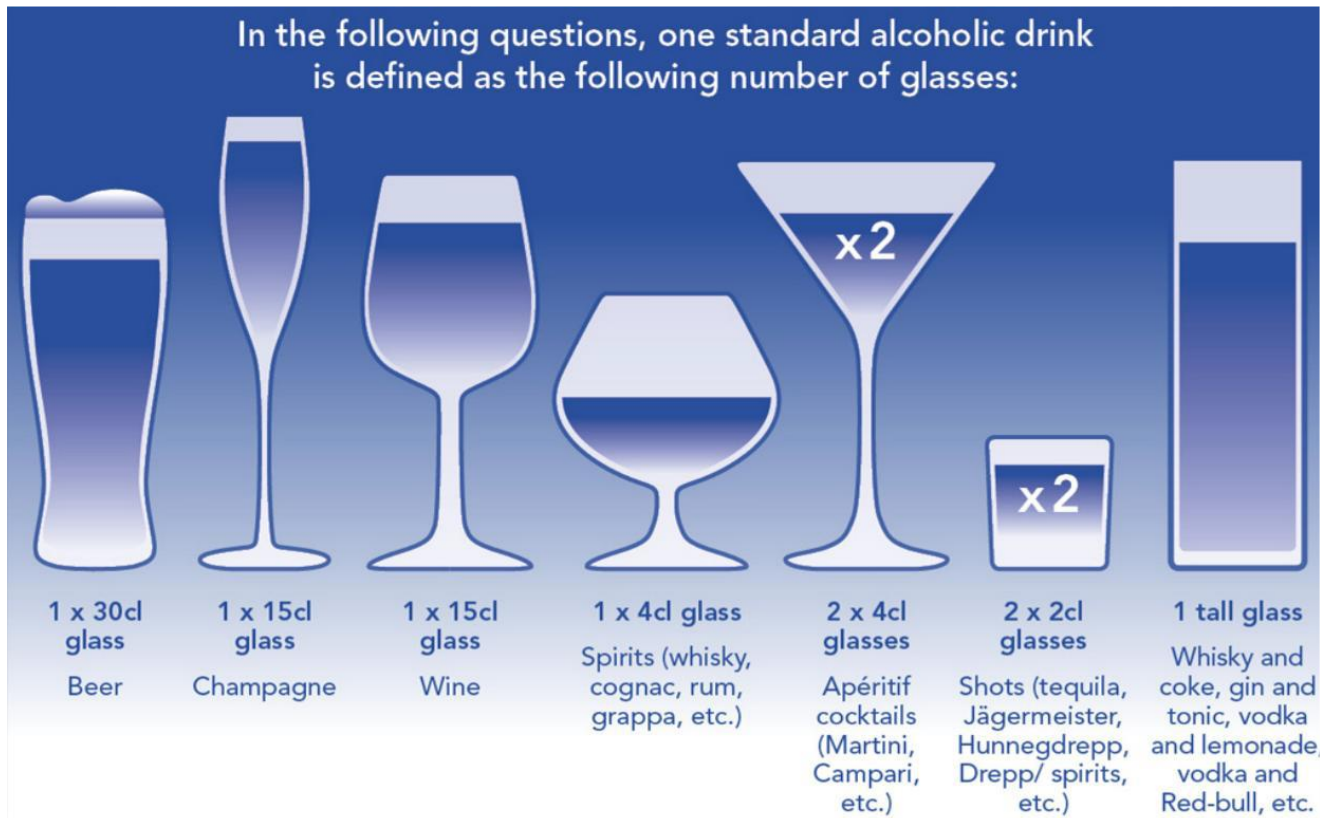

13.03. During the last 12 months, how often have you had a drink containing alcohol?

- Never → **SKIP TO page 49**
- Monthly or less
- 2 to 4 times a month
- 2 to 3 times a week
- 4 or more times a week

13.04. How many drinks containing alcohol do you have on a typical day when you are drinking?

- 1 or 2
- 3 or 4
- 5 or 6
- 7 to 9
- 10 or more

13.05. How often do you have five or more drinks on one occasion?

- Never
- Less than monthly
- Monthly
- Weekly
- Daily or almost daily

13.06. How often during the last year have you found that you were not able to stop drinking once you had started?

- Never
- Less than monthly
- Monthly
- Weekly
- Daily or almost daily

13.07. How often during the last year have you failed to do what was normally expected of you because of drinking?

- Never
- Less than monthly
- Monthly
- Weekly
- Daily or almost daily

13.08. How often during the last year have you needed a first drink in the morning to get yourself going after a heavy drinking session?

- Never
- Less than monthly
- Monthly
- Weekly
- Daily or almost daily

13.09. How often during the last year have you had a feeling of guilt or remorse after drinking?

- Never
- Less than monthly
- Monthly
- Weekly
- Daily or almost daily

13.10. How often during the last year have you been unable to remember what happened the night before because of your drinking?

- Never
- Less than monthly
- Monthly
- Weekly
- Daily or almost daily

13.11. Have you or someone else been injured because of your drinking?

- No
- Yes, but not in the last year
- Yes, during the last year

13.12. Has a relative, friend, doctor, or other health care worker been concerned about your drinking or suggested you cut down?

- No
- Yes, but not in the last year
- Yes, during the last year

You have reached the END of the questionnaire.

We thank you for your involvement.
